# Supplementary material for: Development of a bi-compound heterogeneous cocatalyst modified p-Si photocathode for boosting the photoelectrochemical water splitting performance
Source: Royal Society of Chemistry journal article supplement (doi:10.1039/d0ta12161d), 2021-01-01
Supplement: d0ta12161d1.pdf [file d0ta12161d1.pdf]

## Supporting Information

# Development of bi-compound heterogeneous cocatalyst modified p-Si photocathode for boosting the photoelectrochemical water splitting performance

Zhiwei Chen, Yang Li, Lin Wang, Yuyu Bu,\* Jin-Ping Ao

Key Laboratory of Wide Band-Gap Semiconductor Materials and Devices, School of Microelectronics, Xidian University, Xi'an, 710071, China.

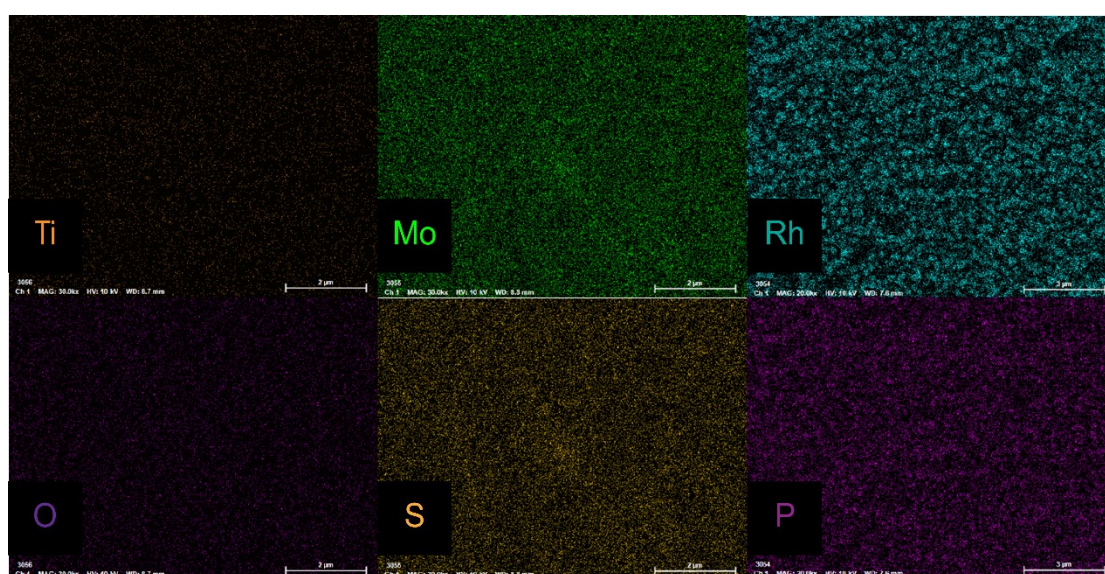

Figure S1. EDS mapping images of p-Si-TiO<sub>2</sub>-MoS<sub>2</sub>/Rh-P.

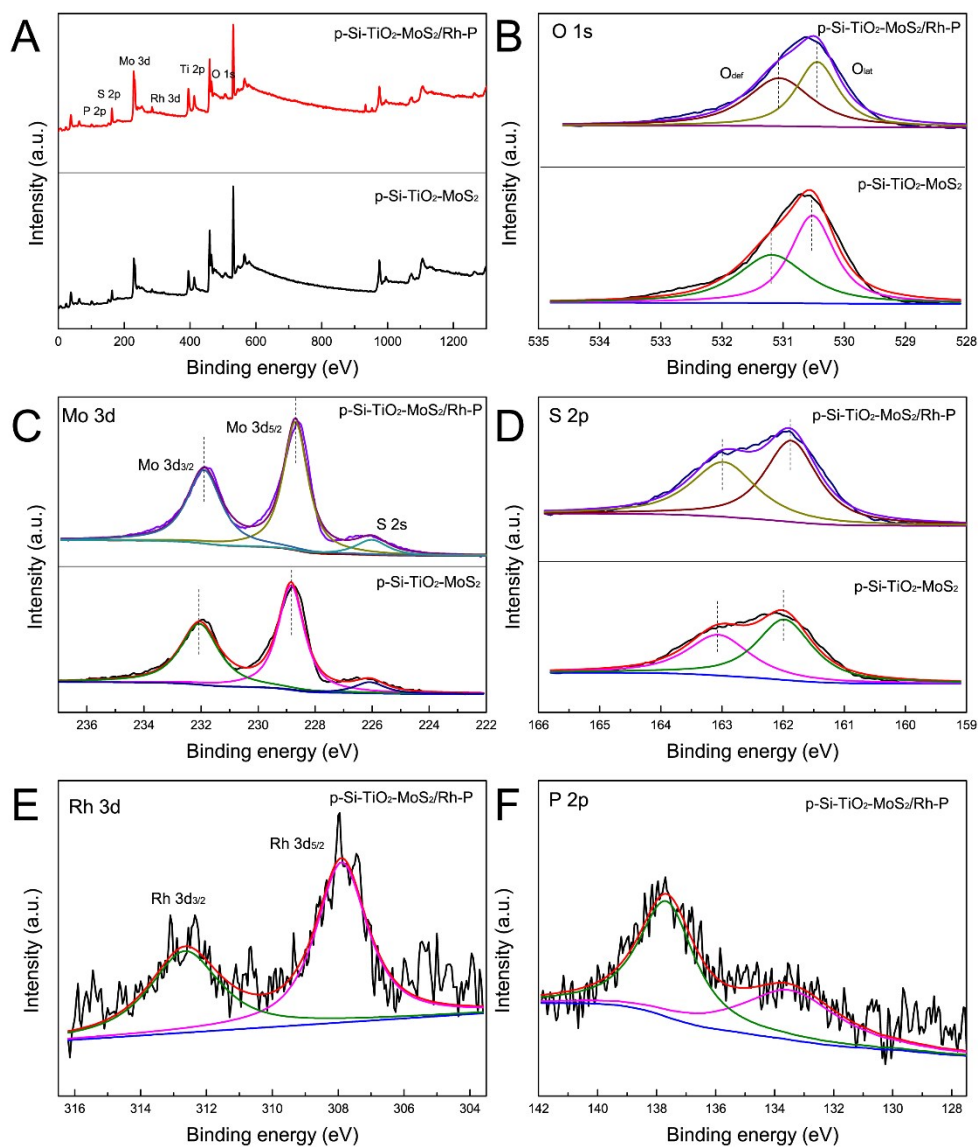

Figure S2. The total XPS survey spectra (A) and high resolution O 1s (B), Mo 3d (C), S 2p (D) XPS spectra of  $p\text{-Si-TiO}_2\text{-MoS}_2$  and  $p\text{-Si-TiO}_2\text{-MoS}_2/\text{Rh-P}$ , high resolution Rh 3d (E) and P 2p (F) XPS spectra of  $p\text{-Si-TiO}_2\text{-MoS}_2/\text{Rh-P}$ .

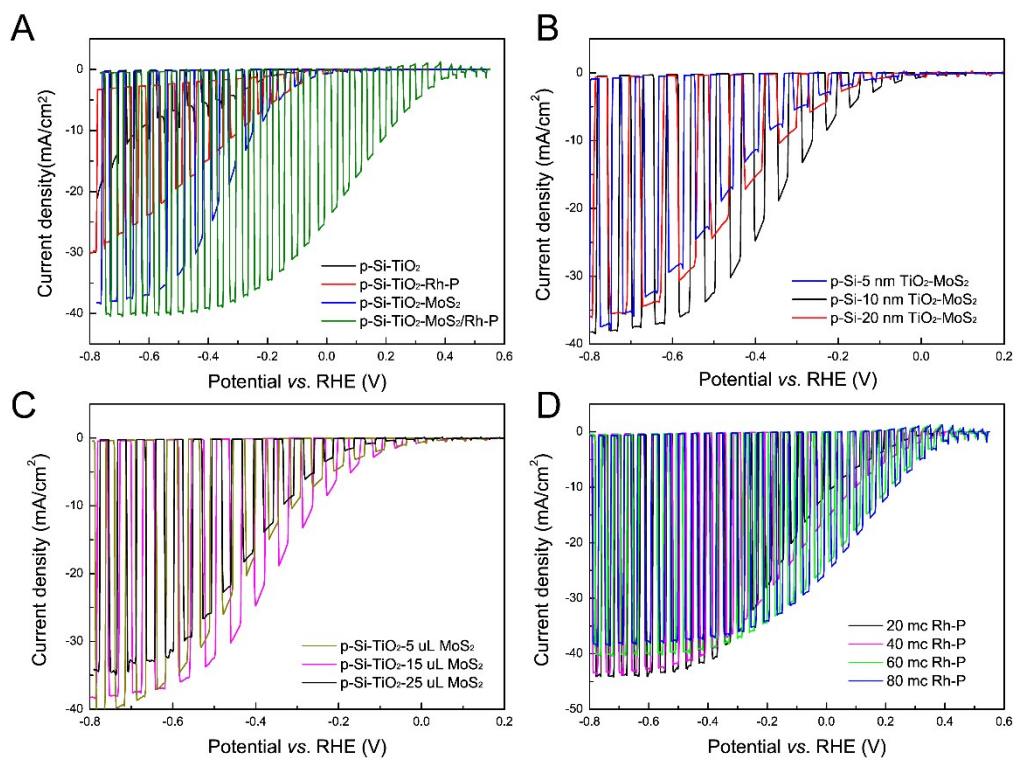

Figure S3. (A) Current density-potential curves of the series photocathodes. Current density-potential curves of p-Si-TiO<sub>2</sub>-MoS<sub>2</sub> with different deposition conditions of (B) TiO<sub>2</sub>, (C) MoS<sub>2</sub> and (D) Rh-P.

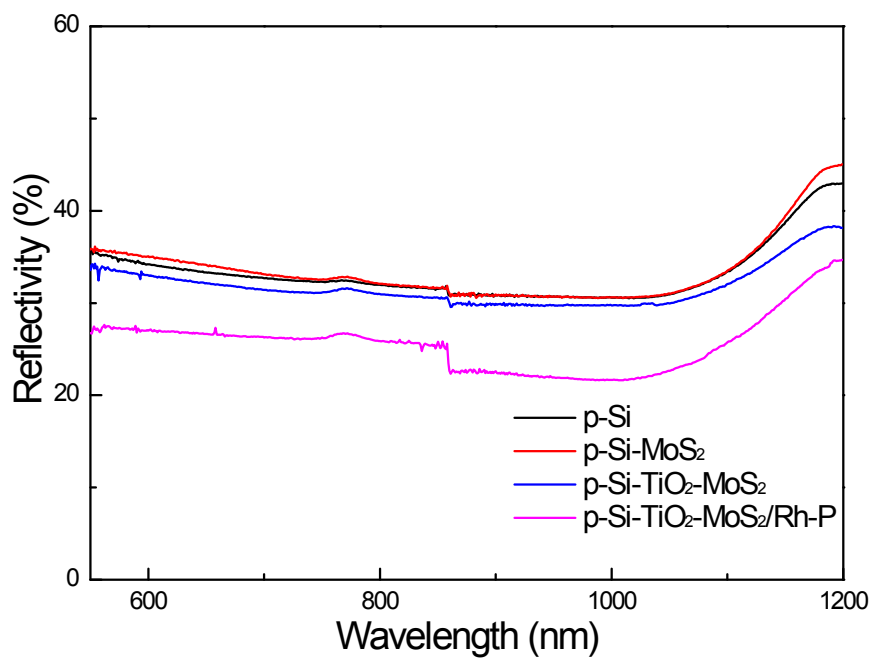

Figure S4. Surface reflectivity of the series photocathodes.

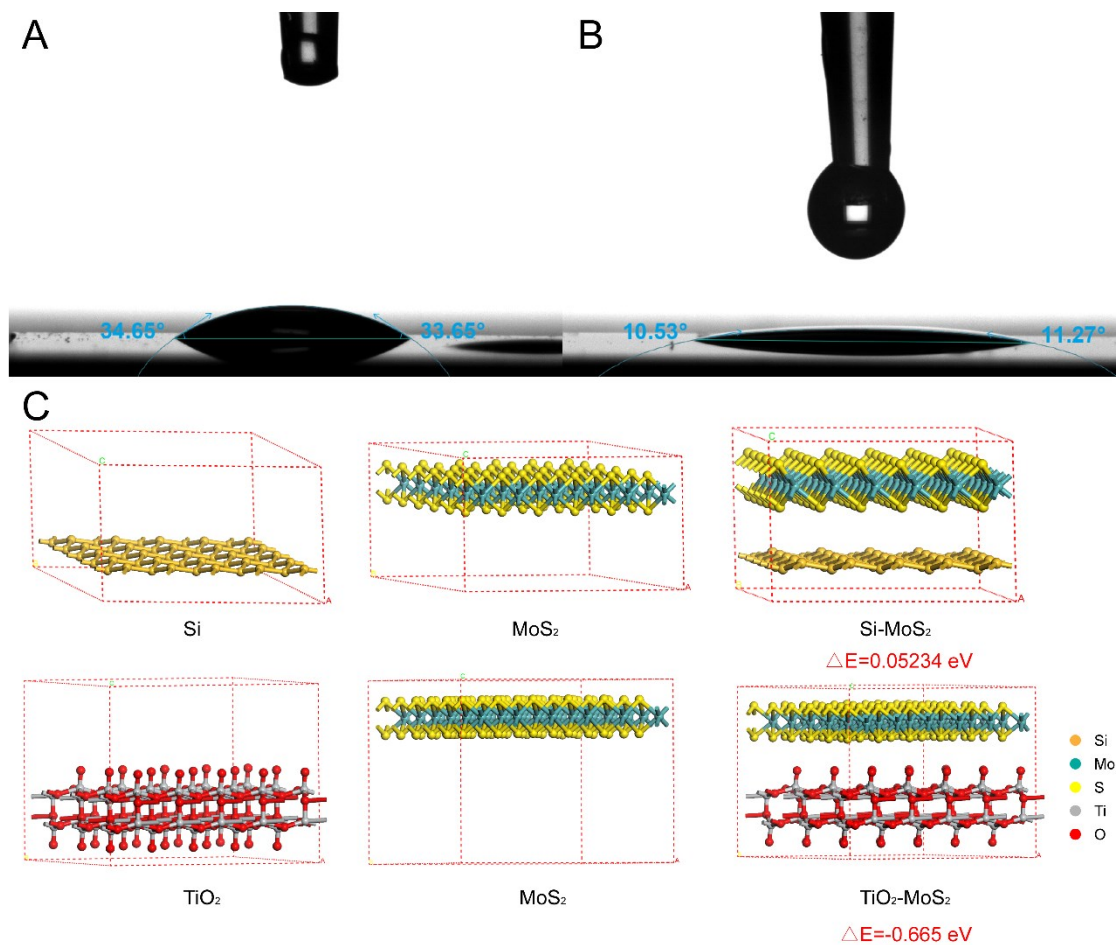

Figure S5. Contact angle test results of (A) p-Si and (B) p-Si-TiO<sub>2</sub>, (C) the optimization model for Si, MoS<sub>2</sub>, Si-MoS<sub>2</sub>, TiO<sub>2</sub> and TiO<sub>2</sub>-MoS<sub>2</sub>.

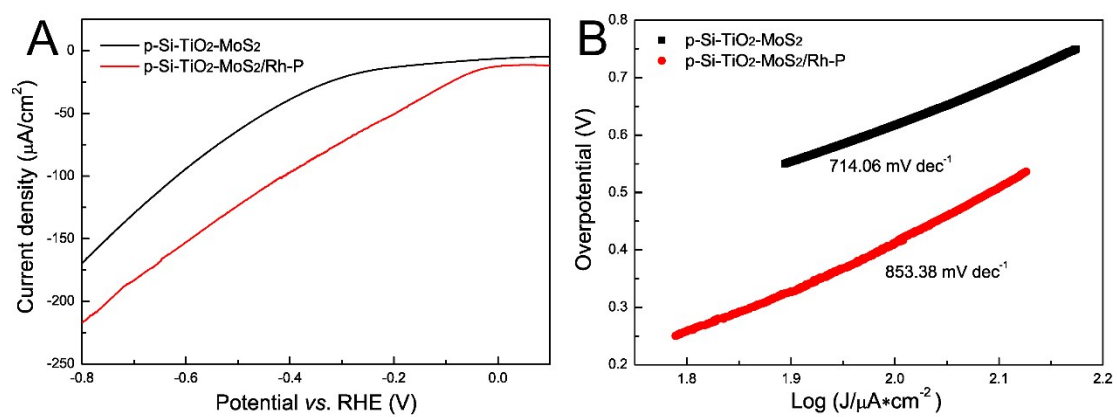

Figure S6. (A) LSV curves of p-Si-TiO<sub>2</sub>-MoS<sub>2</sub> and p-Si-TiO<sub>2</sub>-MoS<sub>2</sub>/Rh-P for HER. (B) The corresponding Tafel plots.

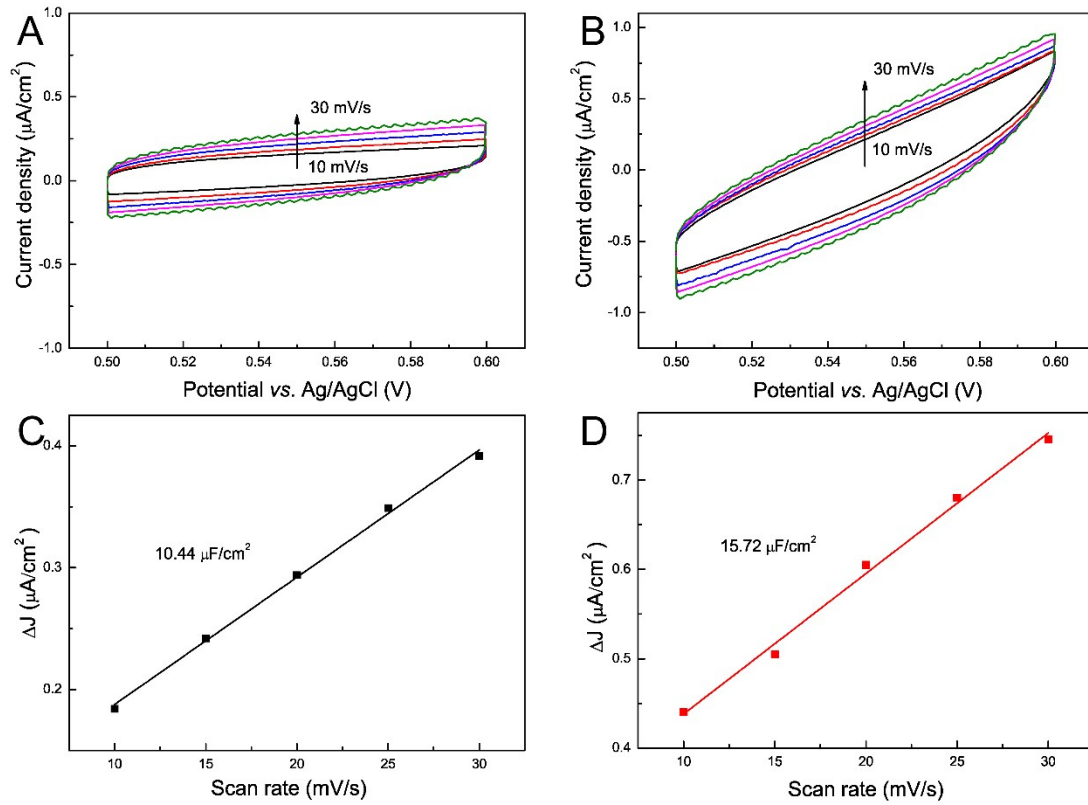

Figure S7. Cyclic voltammograms of (A) p-Si-TiO<sub>2</sub>-MoS<sub>2</sub> and (B) p-Si-TiO<sub>2</sub>-MoS<sub>2</sub>/Rh-P against different scan rates. The corresponding charging current density differences of (C) p-Si-TiO<sub>2</sub>-MoS<sub>2</sub> and (D) p-Si-TiO<sub>2</sub>-MoS<sub>2</sub>/Rh-P.

Table S1. Parameters fitted from the PEIS curves of the series photocathodes.

| Sample                                        | $R_s$ ( $\Omega$ cm <sup>-2</sup> ) | $R_t$ ( $\Omega$ cm <sup>-2</sup> ) | $R_i$ ( $\Omega$ cm <sup>-2</sup> ) |
|-----------------------------------------------|-------------------------------------|-------------------------------------|-------------------------------------|
| p-Si                                          | 3.99                                | 12.58 k                             | \                                   |
| p-Si-MoS <sub>2</sub>                         | 17.08                               | 753.46                              | \                                   |
| p-Si-TiO <sub>2</sub> -MoS <sub>2</sub>       | 6.66                                | 22.74                               | 49.94                               |
| p-Si-TiO <sub>2</sub> -MoS <sub>2</sub> /Rh-P | 6.14                                | 4.90                                | 6.37                                |
